# Supplementary material
Source: MDPI journal article supplement (https://www.mdpi.com/search?q=sustainability-08-00704)
Supplement: s001 [file sustainability-08-00704-s001.pdf]

# Supplementary Materials: Conventional, Partially Converted and Environmentally Friendly Farming in South Korea: Profitability and Factors Affecting Farmers' Choice

Saem Lee, Trung Thanh Nguyen, Patrick Poppenborg, Hio-Jung Shin and Thomas Koellner

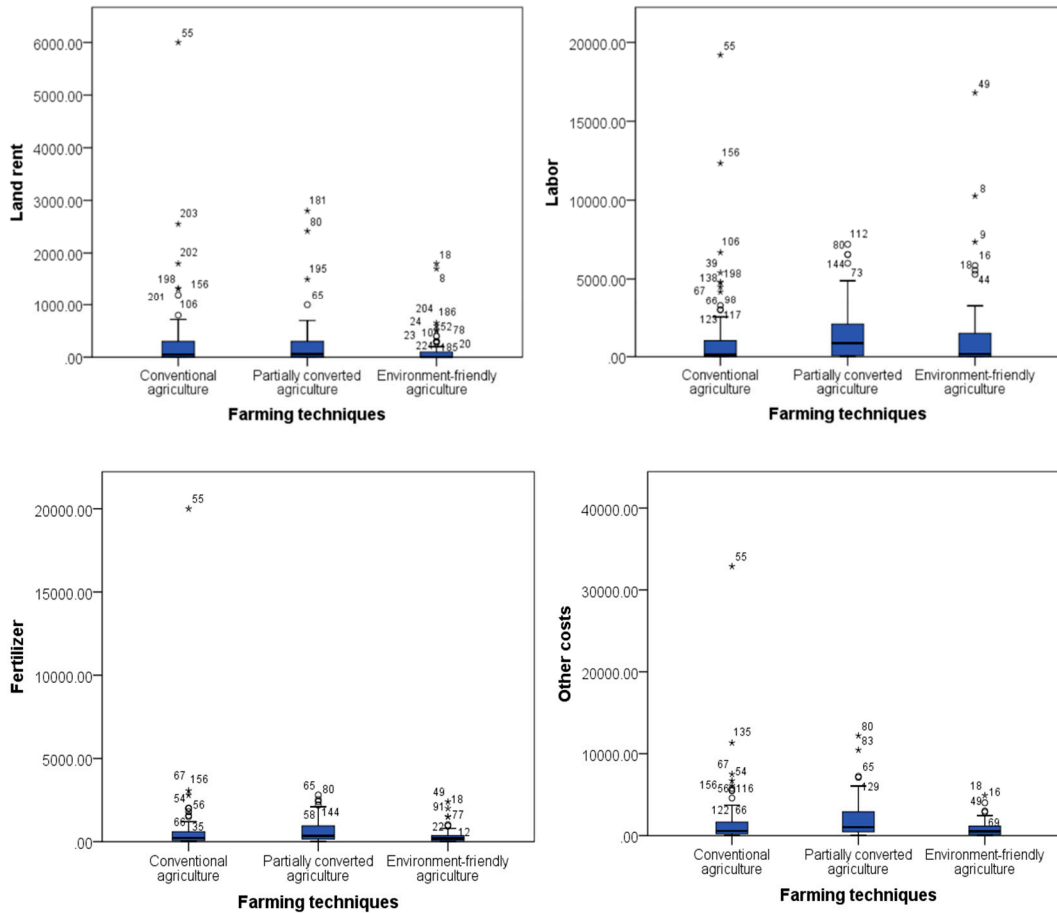

Figure S1. Distribution of costs per farm including outliers (N: 224).

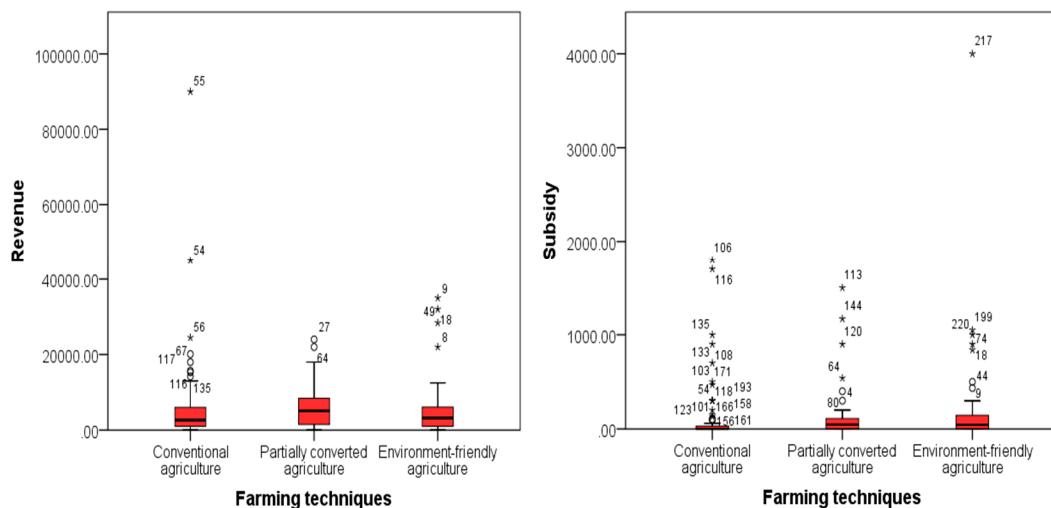

Figure S2. Cont.

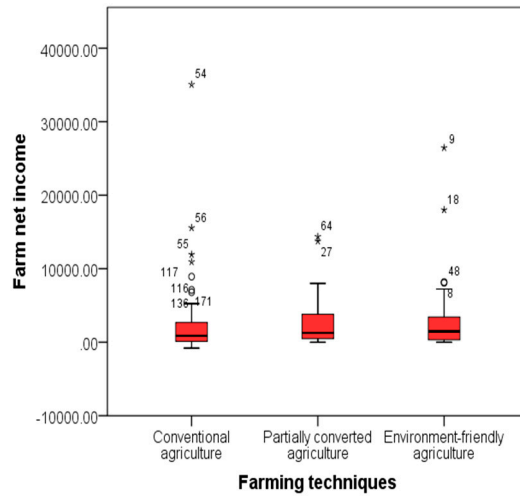

Figure S2. Distribution of benefits (red) per farm including outliers (N: 224).

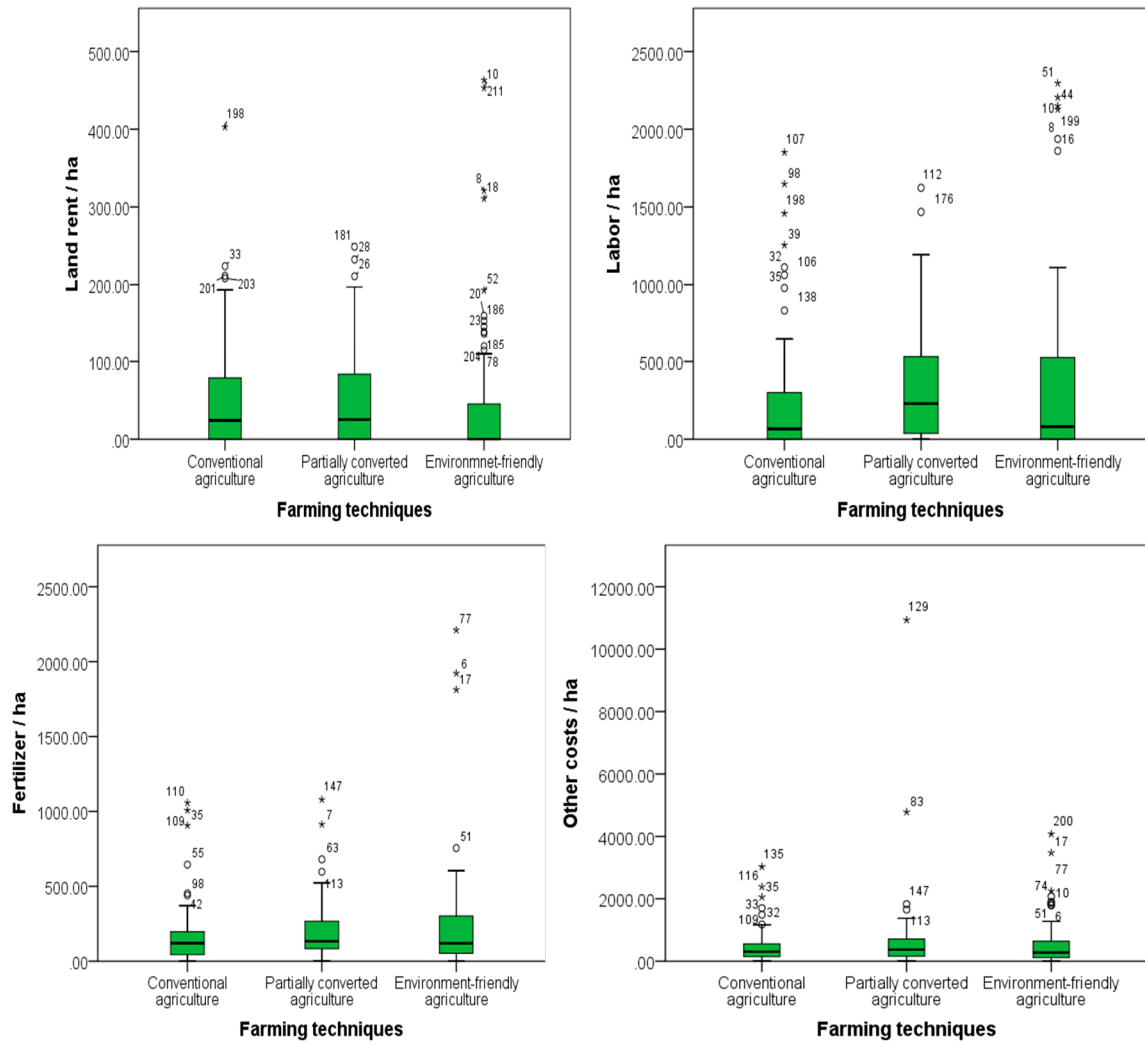

Figure S3. Distribution of costs per ha including outliers (N: 224).

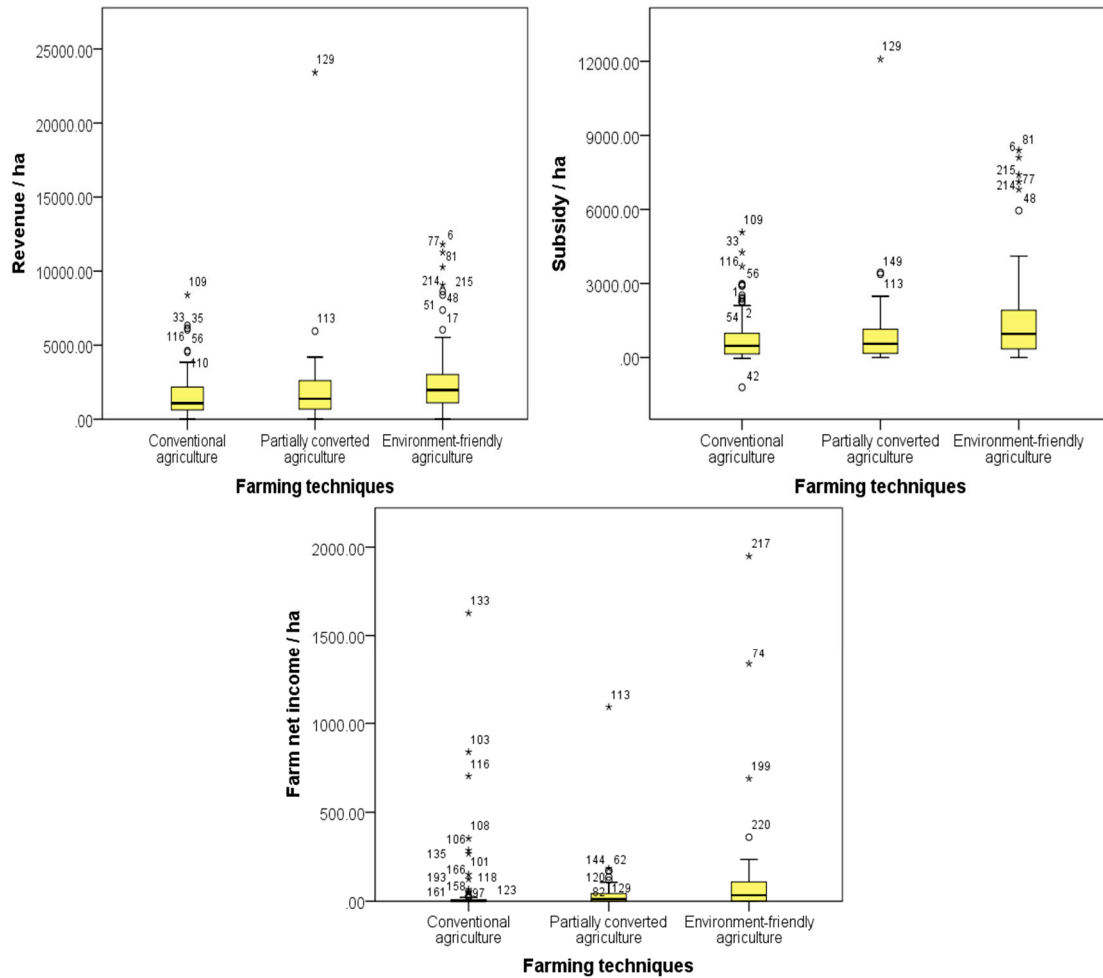

Figure S4. Distribution of benefits (yellow) per ha including outliers (N: 224).

Table S1. Total and organic cultivated area and the consumed quantity per ha of chemical fertilizers and pesticide in South Korea.

|                                     |                                    | 2009 | 2010 | 2011 | 2012 | 2013 |
|-------------------------------------|------------------------------------|------|------|------|------|------|
| Total cultivated areas (1000 ha)    |                                    | 1795 | 1773 | 1756 | 1788 | 1769 |
| Organic cultivated area (1000 ha)   |                                    | 13.3 | 15.5 | 19.3 | 25.5 | 21.2 |
| Rate of organic cultivated area (%) |                                    | 0.7  | 0.8  | 1.1  | 1.4  | 1.2  |
| Chemical fertilizers                | Total quantity consumed (1000 ton) | 500  | 423  | 447  | 472  | 459  |
|                                     | The quantity consumed per ha (kg)  | 267  | 233  | 249  | 267  | 262  |
| Pesticides                          | Total quantity consumed(1000 ton)  | 22.8 | 20.4 | 19.1 | 17.4 | 18.7 |
|                                     | The quantity consumed per ha (kg)  | 12.2 | 11.2 | 10.6 | 9.9  | 10.7 |

**Table S2.** Main crops in percentage of farmers cultivating it and its average farm size split by farming techniques (Conventional farming CF, Partially Converted farming PCF and Environment-Friendly Farming EFF).

| Main Crops            | CF (N:85)                    |                                    | PCF (N:65)                   |                                    | EFF (N:67)                   |                                    |
|-----------------------|------------------------------|------------------------------------|------------------------------|------------------------------------|------------------------------|------------------------------------|
|                       | Farmers Cultivating Crop (%) | Average Farm Size (ha) (Std. Dev.) | Farmers Cultivating Crop (%) | Average Farm Size (ha) (Std. Dev.) | Farmers Cultivating Crop (%) | Average Farm Size (ha) (Std. Dev.) |
| Chili                 | 20.3                         | 0.5 (0.6)                          | 11.2                         | 0.7 (0.7)                          | 13.9                         | 0.5 (0.5)                          |
| Chinese cabbage       | 4.1                          | 1.4(1.1)                           | 4.6                          | 0.9 (0.6)                          | 5.4                          | 0.5 (0.4)                          |
| Chinese radish        | 6.5                          | 1.6 (1.5)                          | 6.0                          | 1.2 (1.1)                          | 3.9                          | 0.6 (0.6)                          |
| Codonopsis lanceolata | 1.0                          | 0.6(0.3)                           | 4.3                          | 0.8 (0.6)                          | 5.8                          | 0.9(1.1)                           |
| Crown Daisy           | 1.0                          | 0.2 (0.2)                          | 9.7                          | 0.2 (0.2)                          | 9.3                          | 0.2 (0.3)                          |
| Potato                | 14.8                         | 1.3 (1.5)                          | 14.6                         | 0.9(1.0)                           | 9.3                          | 0.7 (0.7)                          |
| Rice                  | 11.3                         | 2.2 (3.8)                          | 6.0                          | 1.0 (0.7)                          | 2.3                          | 3.0 (2.3)                          |
| Soybean               | 14.4                         | 1.0 (1.1)                          | 9.5                          | 1.8 (3.6)                          | 5.0                          | 1.0 (1.0)                          |
